# Supplementary material
Source: HighWire-hosted journal article supplement (https://hw-f5-jim.highwire.org/content/70/6/1342)
Supplement: inline-supplementary-material-1 [file inline-supplementary-material-1.pdf]

|                       | Reporting Quality | External Validity | Internal Validity (Bias) | Internal Validity (Confounding) | Power | Aggregate Score |
|-----------------------|-------------------|-------------------|--------------------------|---------------------------------|-------|-----------------|
| Berens, 2020          | ⚠                 | ⚠                 | ✗                        | ⚠                               | ✓     | ✗               |
| Bradford, 2012        | ✗                 | ✓                 | ✗                        | ⚠                               | ✓     | ✗               |
| Chandan, 2020         | ⚠                 | ✓                 | ✓                        | ✓                               | ✓     | ✓               |
| Fuller-Thompson, 2011 | ✓                 | ✓                 | ✓                        | ✓                               | ✓     | ✓               |
| Goodwin, 2013         | ⚠                 | ✓                 | ✓                        | ⚠                               | ✓     | ✓               |
| Heitkemper, 2001      | ✓                 | ✓                 | ✓                        | ✓                               | ✓     | ✓               |
| Heitkemper, 2011      | ✓                 | ✓                 | ✓                        | ⚠                               | ✓     | ✓               |
| Jones, 2013           | ✓                 | ✓                 | ✓                        | ✓                               | ✓     | ✓               |
| Ju, 2020              | ✓                 | ✓                 | ✓                        | ✗                               | ✓     | ✓               |
| Park, 2016            | ✓                 | ✗                 | ✓                        | ✓                               | ✓     | ⚠               |
| Rahal, 2020           | ⚠                 | ✓                 | ✗                        | ⚠                               | ✓     | ✗               |
| Talley, 1993          | ✓                 | ✗                 | ✓                        | ✗                               | ✓     | ✗               |
| Talley, 1994          | ✗                 | ✓                 | ✗                        | ⚠                               | ✓     | ✗               |
| Talley, 1998          | ⚠                 | ✓                 | ⚠                        | ✗                               | ✓     | ⚠               |
| Videlock, 2009        | ✓                 | ✓                 | ✓                        | ✓                               | ✓     | ✓               |
