# Supplementary material
Source: HighWire-hosted journal article supplement (https://hw-f5-jim.highwire.org/content/70/6/1342)

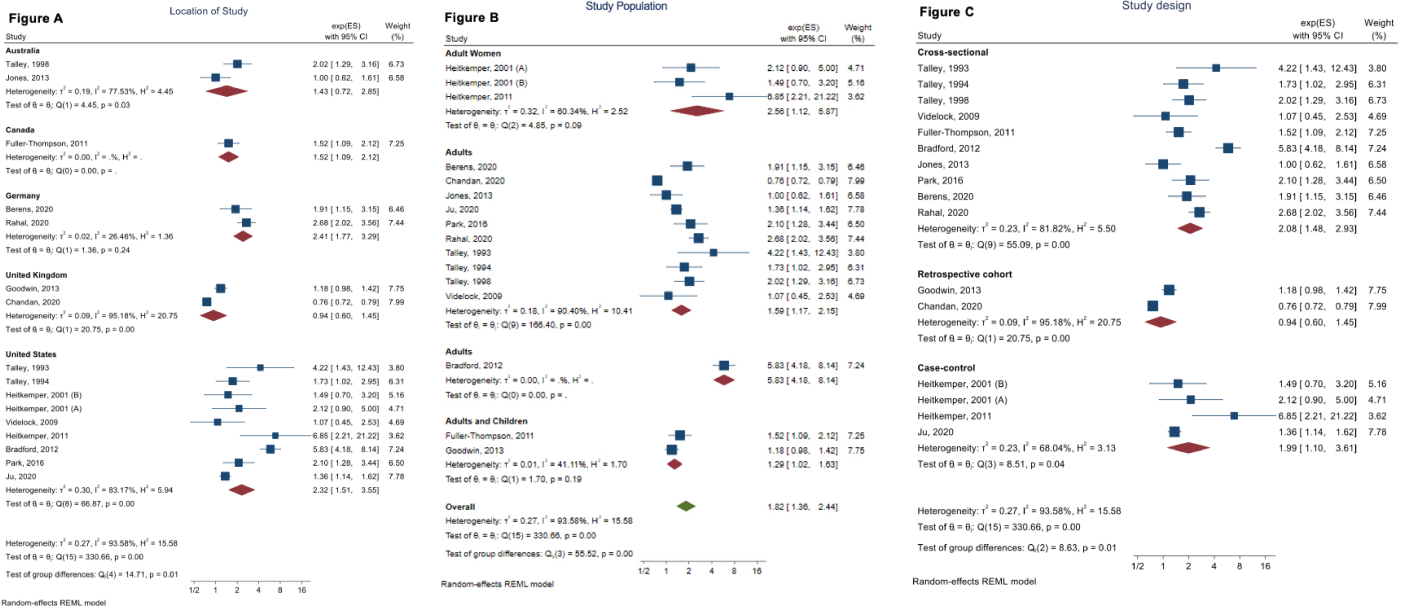

Supplement: inline-supplementary-material-2 [file inline-supplementary-material-2.pdf]
